# Supplementary material for: The significance of G-CSF expression and myeloid-derived suppressor cells in the chemoresistance of uterine cervical cancer
Source: PubMed Central journal article supplement (PMC4678366; doi:10.1038/srep18217), 2015-12-15
Supplement: srep18217-s1.pdf [file srep18217-s1.pdf]

# **The significance of G-CSF expression and myeloid-derived suppressor cells in the chemoresistance of uterine cervical cancer**

**Mahiru Kawano, Seiji Mabuchi, Yuri Matsumoto,  
Tomoyuki Sasano, Ryoko Takahashi, Hiromasa  
Kuroda, Katsumi Kozasa, Kae Hashimoto, Aki Isobe,  
Kenjiro Sawada, Toshimitsu Hamasaki, Eiichi Morii,  
Tadashi Kimura**

Supplementary Table S1. Patients' characteristics

|                                 |                  | All patients           | G-CSF strong           | G-CSF zero-weak        | P-value*  |        |
|---------------------------------|------------------|------------------------|------------------------|------------------------|-----------|--------|
|                                 |                  | Number of patients (%) | Number of patients (%) | Number of patients (%) |           |        |
|                                 |                  | (n=82)                 | (n=15)                 | (n=67)                 |           |        |
| Age                             | Mean (SD)        | 55.4 (12.5)            | 55.3 (10.7)            | 55.5 (12.9)            | 0.8524    |        |
|                                 | ≤59              | 50 (61.0)              | 11 (73.3)              | 39 (58.2)              | 0.2679    |        |
|                                 | 60≤              | 32 (39.0)              | 4 (26.7)               | 28 (41.8)              |           |        |
| Disease status and FIGO stage   | Recurrent        | IA-IIA                 | 24 (29.3)              | 7 (46.7)               | 17 (25.4) | 0.1105 |
|                                 |                  | IIB-IVA                | 42 (51.2)              | 4 (26.7)               | 38 (56.7) |        |
|                                 | Advanced         | IVB                    | 16 (19.5)              | 4 (26.7)               | 12 (17.9) |        |
| Site of disease                 | Pelvic           | 21 (25.6)              | 6 (40.0)               | 15 (22.4)              | 0.2686    |        |
|                                 | Distant          | 19 (23.2)              | 4 (26.7)               | 15 (22.4)              |           |        |
|                                 | Pelvic + Distant | 42 (51.2)              | 5 (33.3)               | 37 (55.2)              |           |        |
| Histology                       | SCC              | 51 (62.2)              | 9 (60.0)               | 42 (62.7)              | 0.0621    |        |
|                                 | A or AS          | 26 (31.7)              | 3 (20.0)               | 23 (34.3)              |           |        |
|                                 | Others           | 5 (6.1)                | 3 (20.0)               | 2 (2.9)                |           |        |
| Performance status              | 0-1              | 72 (87.8)              | 12 (80.0)              | 60 (89.6)              | 0.3339    |        |
|                                 | 2                | 10 (12.2)              | 3 (20.0)               | 7 (10.5)               |           |        |
| Symptoms                        | Yes              | 31 (37.8)              | 5 (33.3)               | 26 (38.8)              | 0.6908    |        |
|                                 | No               | 51 (62.2)              | 10 (66.7)              | 41 (61.2)              |           |        |
| Treatment free interval (month) | Median (Min-max) | 7 (0-132)              | 5 (0-132)              | 7 (0-91)               | 0.1411†   |        |
|                                 | ≤12              | 59 (72.0)              | 11 (73.3)              | 48 (71.6)              |           |        |
|                                 | 11≤              | 23 (28.0)              | 4 (26.7)               | 19 (28.4)              |           |        |
| Prior systemic chemotherapy     | Yes              | 10 (12.2)              | 2 (13.3)               | 8 (11.9)               | 0.8827    |        |
|                                 | No               | 72 (87.8)              | 13 (86.7)              | 59 (88.1)              |           |        |
| Chemotherapy regimen            | CBDCA+PTX        | 60 (73.2)              | 8 (53.3)               | 52 (77.6)              | 0.0577    |        |
|                                 | CBDCA+PTX+EPI    | 13 (15.9)              | 3 (20.0)               | 10 (14.9)              |           |        |
|                                 | CDGP+5-FU        | 5 (6.1)                | 3 (20.0)               | 2 (3.0)                |           |        |
|                                 | Others           | 4 (4.9)                | 1 (6.7)                | 3 (4.5)                |           |        |

\* Wilcoxon Rank Sum tests were used for continuous variables (Age). Chi-square test and Fisher's Exact test were used for categorical variables (Age, Disease status, Site of disease, Histology, Performance status, Symptoms, Treatment free interval, Prior systemic chemotherapy and Chemotherapy regimen). All statistical tests were two-sided.

†Median test

G-CSF = granulocyte-colony stimulating factor; SCC = squamous cell carcinoma; A = adenocarcinoma; AS = adenosquamous carcinoma; CBDCA = carboplatin; PTX = paclitaxel; EPI = epirubicin; CDGP = nedaplatin; 5-FU = fluorouracil.

# Supplementary Figure S1

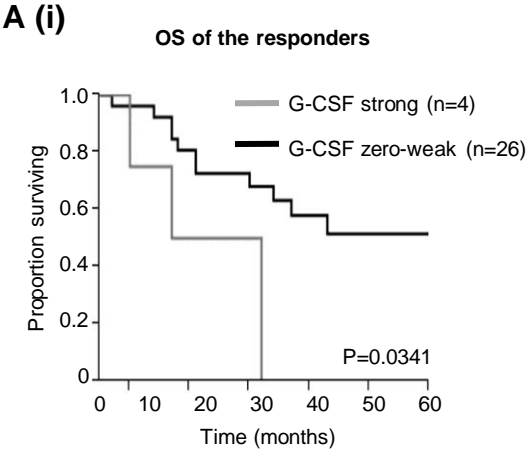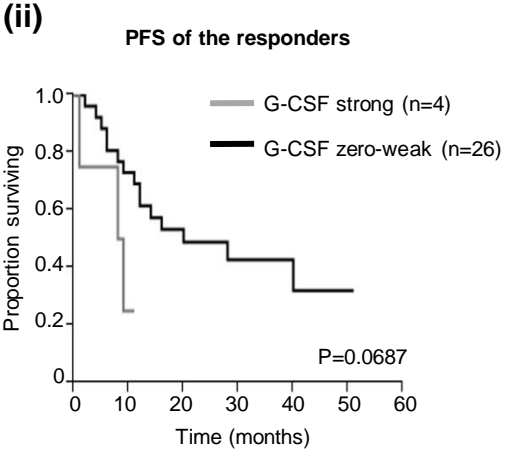

## Supplementary Figure S1. Survival analysis of the responders

A, Kaplan–Meier estimates survival of the responders according to G-CSF immunoreactivity. Log-rank test was used to determine statistical significance. (i) Overall survival (OS). (ii) Progression free survival (PFS).

# Supplementary Figure S2

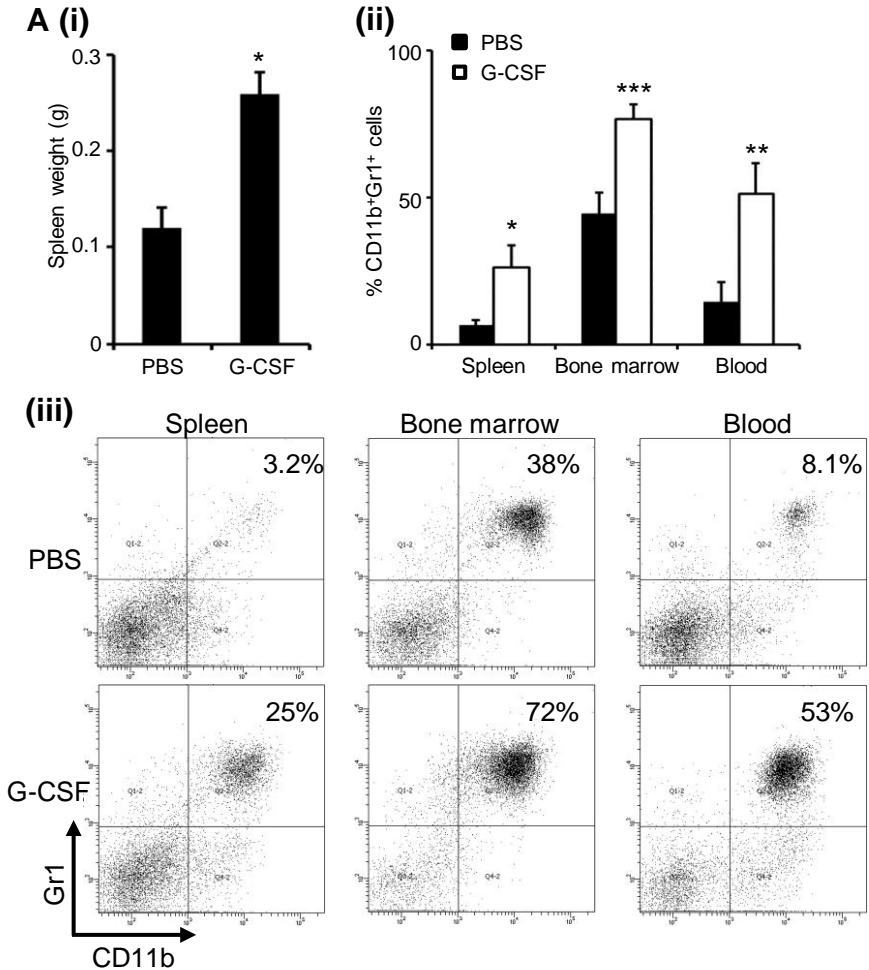

## Supplementary Figure S2. G-CSF-induced MDSC

**A**, Effects of exogenous G-CSF treatment on the spleen weight and the frequency of MDSC. Mice were subcutaneously treated with 10  $\mu$ g recombinant human G-CSF (n=5) or PBS (n=5) for three consecutive days. The spleen, bone marrow, and blood were harvested for evaluation. (i) Spleen weight. Bars, SD. \*, P<0.05, Wilcoxon Rank sum test. (ii) MDSC populations were assessed by flow cytometry. Bars, SD. \*, P<0.05, \*\*, P<0.01, \*\*\*, P<0.001, Two-sided Student *t* test. (iii) Representative dot plot.

### Supplementary Figure S3

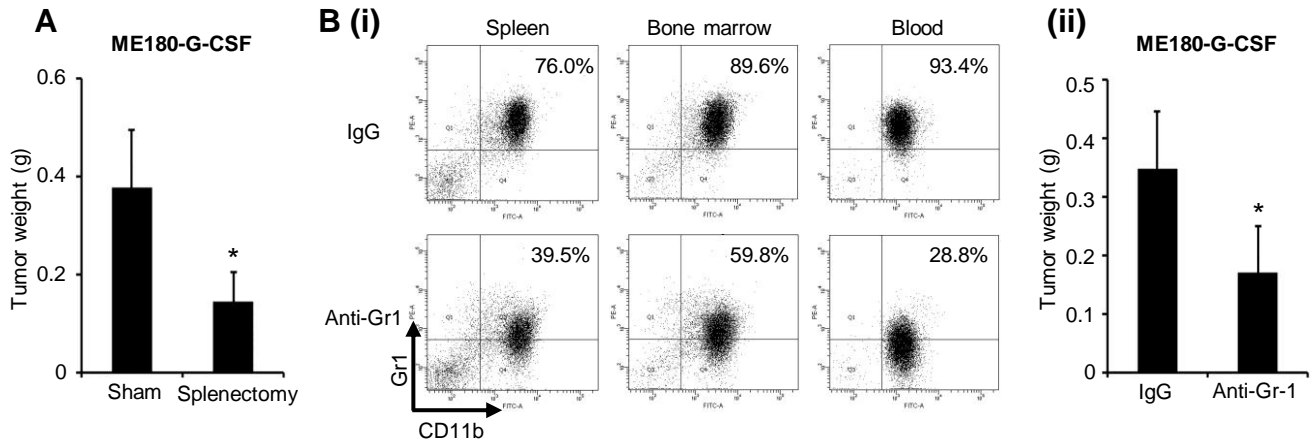

#### Supplementary Figure S3. MDSC depletion and cisplatin-sensitivity

**A**, Effects of spleen removal on the tumor weight of G-CSF-producing cervical cancer. Mice that had undergone splenectomy or sham surgery were inoculated with ME180-G-CSF (n=5 for each group) and treated with cisplatin. Bars, SD. \*, P<0.05, Wilcoxon Rank sum test. **B**, Effects of anti-Gr-1-neutralizing antibody on the MDSC frequency and the tumor weight of G-CSF-producing cervical cancer. Mice carrying ME180-G-CSF-derived tumors were treated with cisplatin in combination with anti-Gr-1-neutralizing antibody or IgG (n=5 for each group). (i) MDSC population. Their spleens, bone marrow, and blood were collected and assayed for MDSC by flow cytometry. Representative dot plot. (ii) Tumor weight. Bars, SD. \*, P<0.05, Wilcoxon Rank sum test.
